# Supplementary material
Source: HighWire-hosted journal article supplement (https://gut.bmj.com/content/71/9/1821)

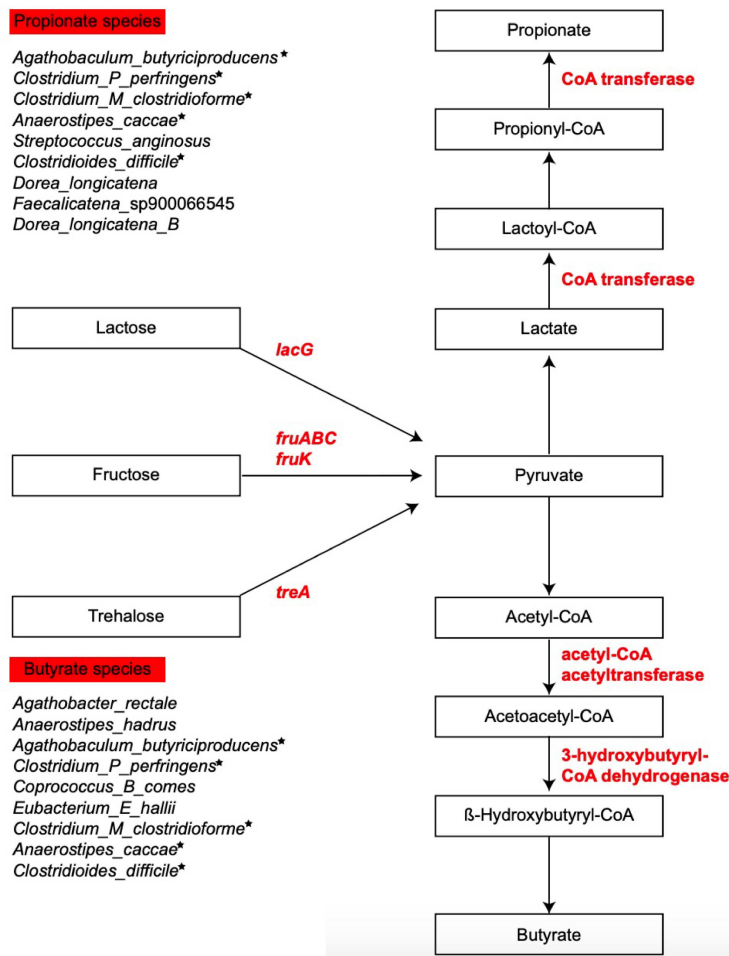

Supplement: inline-supplementary-material-12 [file inline-supplementary-material-12.pdf]
